# Supplementary material for: Molecular analysis of gastric cancer identifies genomic markers of drug sensitivity in Asian gastric cancer
Source: PubMed Central journal article supplement — J Cancer. 2018 Jul 30;9(16):2973–80. doi: 10.7150/jca.25506 (PMC6096361; doi:10.7150/jca.25506), 2018-07-30
Supplement: jcav09p2973s1.pdf [file jcav09p2973s1.pdf]

Supplementary Figure 1 Comparison of clinical features based on mutation count in each sample. (a) Numbers of somatic mutations in each sample. (b) Comparisons between chemo-resistant subgroup and chemo-sensitive subgroup. (c) Comparisons according to the Lauren classification. (d) Comparisons according to the vascular invasion. (e) Comparisons according to the perineuronal invasion.

Supplementary Figure 2 Kaplan–Meier curves are shown for overall survival in the cohorts with gastric cancer. (a) Overall survival in patients with gastric cancer with a high or low clonality. (b) Overall survival in patients with gastric cancer with a high or low mutation burden.

Supplementary Figure 3 Oncoprint of mutations for the common cancer related genes in gastric cancer (GC) by deep sequencing.

Supplementary figure 4 The forestplot shows 31 genes which are highly mutated in chemo-resistant subgroup compared to chemo-sensitive subgroup.

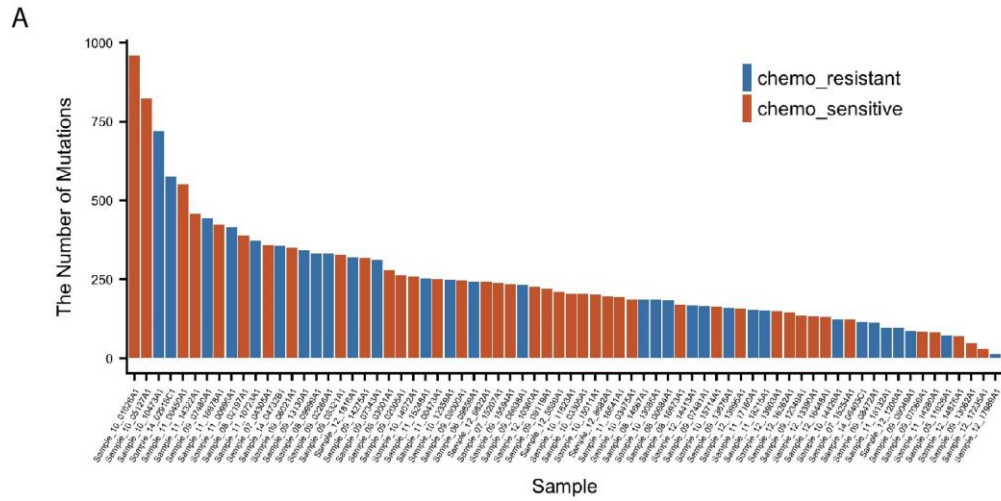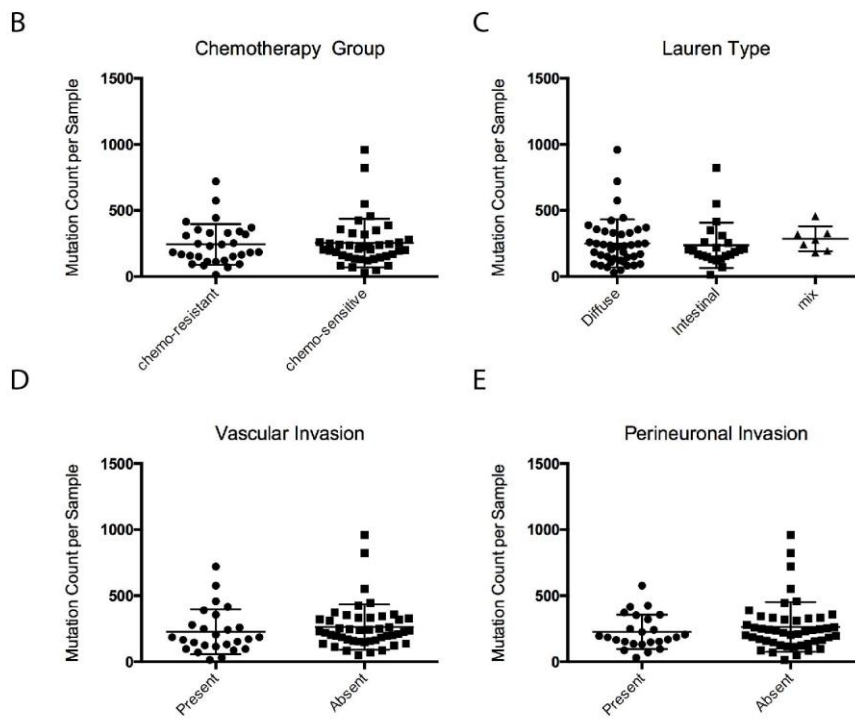

Supplementary Figure 1

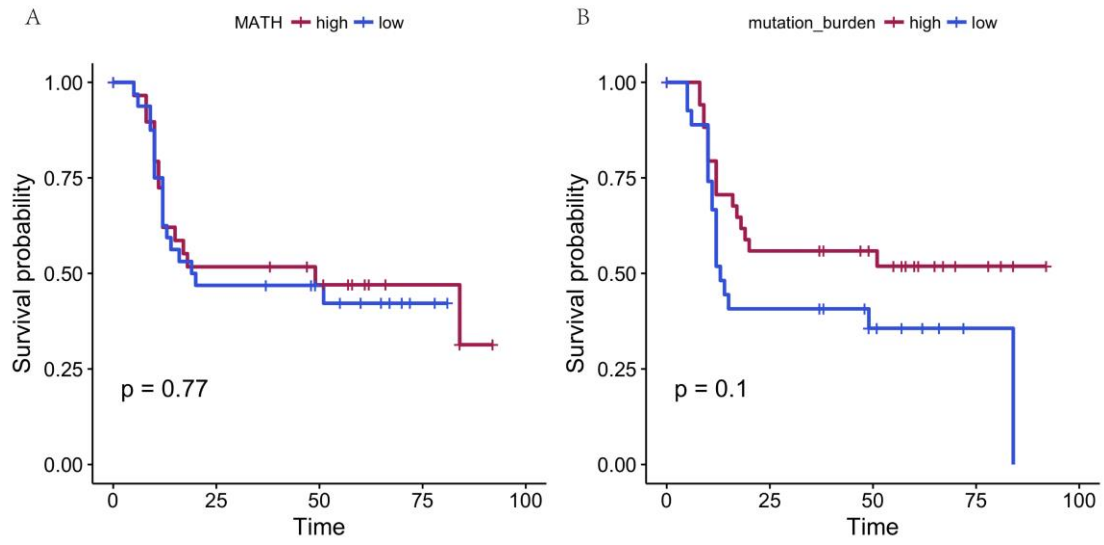

Supplementary Figure 2

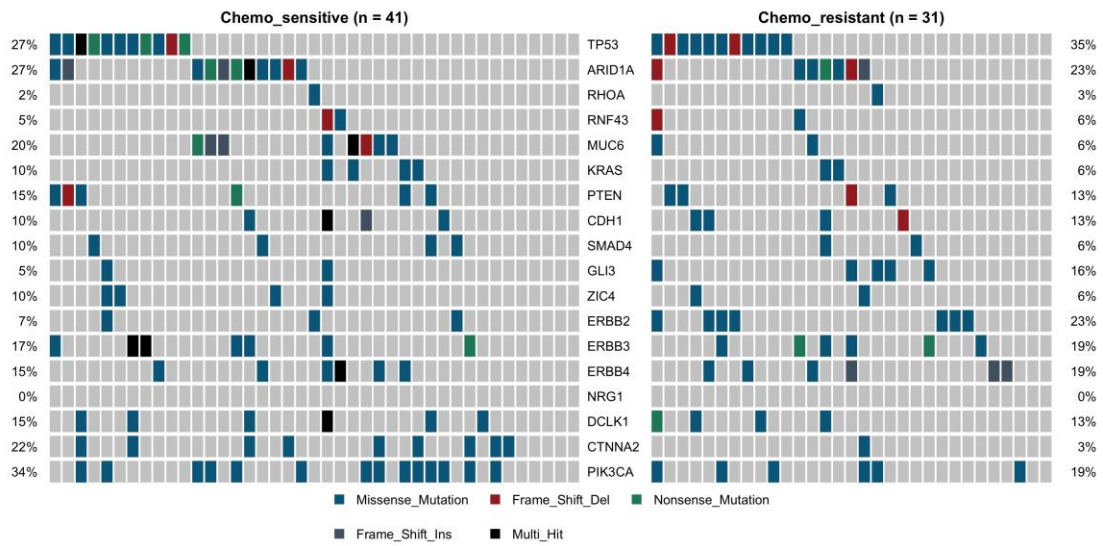

Supplementary Figure 3

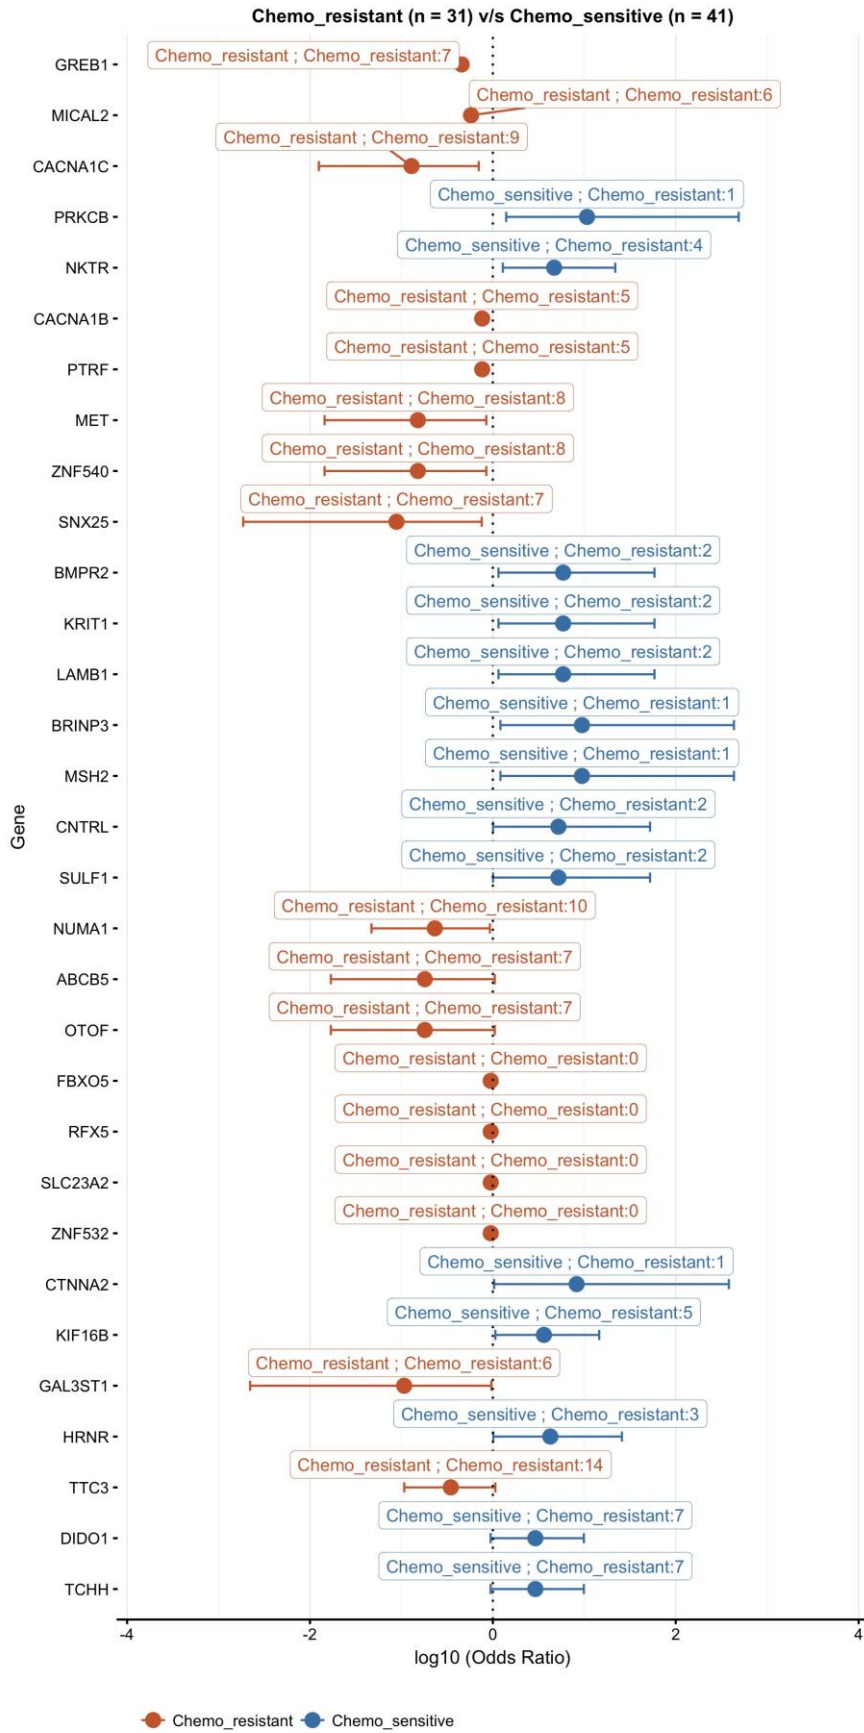

Supplementary figure 4
